# Supplementary material for: IFN-γ- and IL-17-producing CD8+ T (Tc17-1) cells in combination with poly-ICLC and peptide vaccine exhibit antiglioma activity
Source: PubMed Central journal article supplement — J Immunother Cancer. 2021 Jun 30;9(6):e002426. doi: 10.1136/jitc-2021-002426 (PMC8246372; doi:10.1136/jitc-2021-002426), 2021-06-30
Supplement: jitc-2021-002426supp001.pdf [file jitc-2021-002426supp001.pdf]

**Supplemental Figure 1**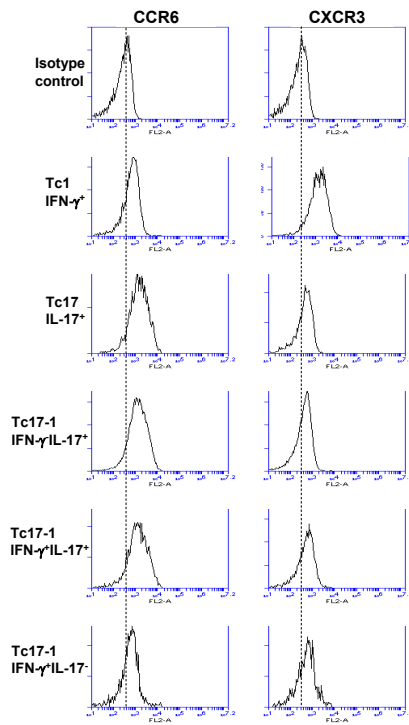

**Supplemental Figure 2**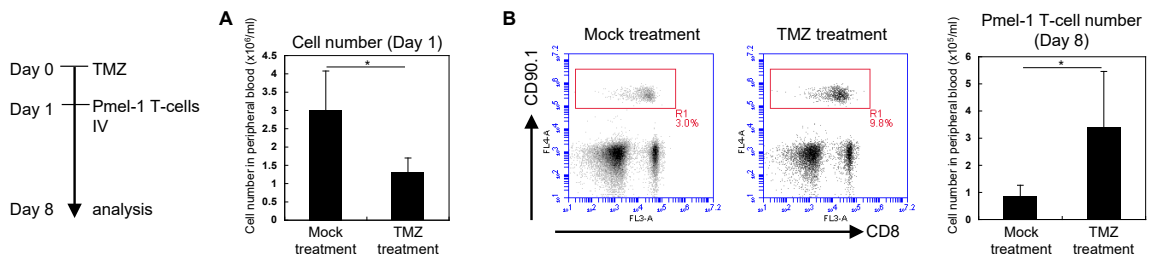

**Supplemental Figure 3**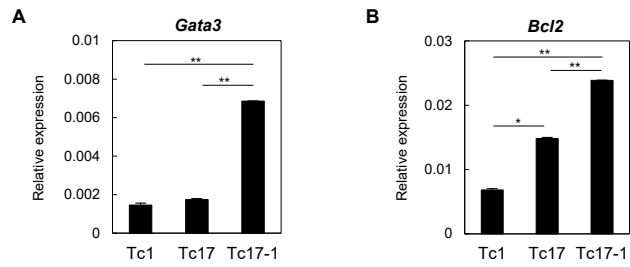

**Supplementary Table 1**

| <b>Reagent</b>                      | <b>Source</b>                                           |
|-------------------------------------|---------------------------------------------------------|
| <b>Recombinant proteins</b>         |                                                         |
| IL-2                                | PeproTech                                               |
| IL-12                               | PeproTech                                               |
| IL-6                                | PeproTech                                               |
| IL-23                               | PeproTech                                               |
| TGF- $\beta$ 1                      | R&D Systems                                             |
| <b>Peptide</b>                      |                                                         |
| hgp100 <sub>25-33</sub> (KVPRNQDWL) | The University of Pittsburgh Peptide Synthesis Facility |
| <b>Monoclonal Antibodies</b>        |                                                         |
| anti-IFN- $\gamma$                  | eBioscience                                             |
| anti-IL4                            | eBioscience                                             |
| anti-IL-17A                         | eBioscience                                             |
| anti-CD3                            | eBioscience                                             |
| anti-CD8a                           | eBioscience                                             |
| anti-CD90.1                         | BD Biosciences                                          |
| anti-CD45                           | BD Biosciences                                          |
| anti-CD44                           | BD Biosciences                                          |
| anti-CD62L                          | BD Biosciences                                          |
| anti-CD29                           | BD Biosciences                                          |
| anti-CD49d                          | BD Biosciences                                          |
| anti-CCR6                           | BioLegend                                               |
| anti-CXCR3                          | BioLegend                                               |
| <b>Probes</b>                       |                                                         |
| Ifng                                | Applied Biosystems                                      |
| Il17a                               | Applied Biosystems                                      |
| Tbx21                               | Applied Biosystems                                      |
| Rorgt                               | Applied Biosystems                                      |
| Gapdh                               | Applied Biosystems                                      |
